# Supplementary material for: The impact of combined application of biochar and fertilizer on the biochemical properties of soil in soybean fields
Source: PeerJ. 2024 Oct 18;12:e18172. doi: 10.7717/peerj.18172 (PMC11493027; doi:10.7717/peerj.18172)
Supplement: Supplemental Information 1 [file peerj-12-18172-s001.xlsx]

## Sheet: Fig.1Temperature in 2021and2022
The year 2021
Month	Temperature(℃)
4	4.7
5	12.4
6	19.3
7	22.7
8	18.1
9	13.3
10	3.8
The year 2022
Month	Temperature(℃)
4	4.6
5	11.9
6	19.3
7	22.7
8	17.9
9	13.1
10	3.2

## Sheet: Fig.1Rainfall in 2021and2022
The year 2021
Month	Rainfall(mm)
4	39.4
5	27.3
6	150.8
7	295.7
8	195.4
9	168.8
10	37.3
The year 2022
Month	Rainfall(mm)
4	35.1
5	44.7
6	73.3
7	139.9
8	112.8
9	93.3
10	13.5

## Sheet: Fig.2-Heihe43 CEC
The year 2021								The year 2022
R2								R2
Treament				CEC(cmol/kg)				Treament				CEC(cmol/kg)
CK-1	0.3596	0.1077	0.346511	31.35				CK-1	0.3596	0.1077	0.346511	15.411
CK-2	0.3671	0.111	0.353523	30.3205				CK-2	0.3671	0.111	0.353523	14.9049
F1+B-1	0.3634	0.1089	0.35016	30.8142				F1+B-1	0.3634	0.1089	0.35016	15.1476
F1+B-2	0.3488	0.1082	0.335339	32.9907				F1+B-2	0.3488	0.1082	0.335339	16.2175
F1-1	0.3655	0.1082	0.352457	30.477				F1-1	0.3655	0.1082	0.352457	14.9818
F1-2	0.3676	0.1097	0.354301	30.2061				F1-2	0.3676	0.1097	0.354301	14.8487
F2+B-1	0.3451	0.1059	0.332018	33.4784				F2+B-1	0.3451	0.1059	0.332018	16.4572
F2+B-2	0.355	0.1106	0.341202	32.1297				F2+B-2	0.355	0.1106	0.341202	15.7943
F2-1	0.3649	0.1104	0.35139	30.6336				F2-1	0.3649	0.1104	0.35139	15.0588
F2-2	0.3485	0.1085	0.33497	33.0449				F2-2	0.3485	0.1085	0.33497	16.2441
R4								R4
Treament				CEC(cmol/kg)				Treament				CEC(cmol/kg)
CK-1	0.3792	0.119	0.364285	28.7401				CK-1	0.3792	0.119	0.364285	14.128
CK-2	0.3628	0.1085	0.349627	30.8925				CK-2	0.3628	0.1085	0.349627	15.1861
F1+B-1	0.3958	0.1329	0.378451	26.6599				F1+B-1	0.3958	0.1329	0.378451	13.1054
F1+B-2	0.3703	0.1113	0.356741	29.8479				F1+B-2	0.3703	0.1113	0.356741	14.6726
F1-1	0.3926	0.1356	0.374617	27.2228				F1-1	0.3926	0.1356	0.374617	13.3822
F1-2	0.3553	0.107	0.342247	31.9762				F1-2	0.3553	0.107	0.342247	15.7188
F2+B-1	0.3827	0.1172	0.368241	28.1591				F2+B-1	0.3827	0.1172	0.368241	13.8424
F2+B-2	0.3579	0.1051	0.345302	31.5276				F2+B-2	0.3579	0.1051	0.345302	15.4983
F2-1	0.3812	0.1167	0.366806	28.3698				F2-1	0.3812	0.1167	0.366806	13.946
F2-2	0.368	0.1082	0.355019	30.1007				F2-2	0.368	0.1082	0.355019	14.7969
R6								R6
Treament				CEC(cmol/kg)				Treament				CEC(cmol/kg)
CK-1	0.3688	0.1131	0.354834	29.6204				CK-1	0.3688	0.1131	0.354834	14.8102
CK-2	0.3656	0.1103	0.352129	30.011				CK-2	0.3656	0.1103	0.352129	15.0055
F1+B-1	0.3732	0.111	0.359775	28.9071				F1+B-1	0.3732	0.111	0.359775	14.4535
F1+B-2	0.3911	0.119	0.376482	26.495				F1+B-2	0.3911	0.119	0.376482	13.2475
F1-1	0.3824	0.1151	0.368364	27.667				F1-1	0.3824	0.1151	0.368364	13.8335
F1-2	0.3747	0.112	0.361108	28.7147				F1-2	0.3747	0.112	0.361108	14.3574
F2+B-1	0.359	0.1094	0.345548	30.9611				F2+B-1	0.359	0.1094	0.345548	15.4805
F2+B-2	0.373	0.1122	0.359324	28.9722				F2+B-2	0.373	0.1122	0.359324	14.4861
F2-1	0.4	0.1119	0.38706	24.9678				F2-1	0.4	0.1119	0.38706	12.4839
F2-2	0.3976	0.1121	0.384559	25.3289				F2-2	0.3976	0.1121	0.384559	12.6644
R8								R8
Treament				CEC(cmol/kg)				Treament				CEC(cmol/kg)
CK-1	0.3764	0.1097	0.363322	28.3951				CK-1	0.3764	0.1097	0.363322	14.1975
CK-2	0.3782	0.1039	0.366356	27.957				CK-2	0.3782	0.1039	0.366356	13.9785
F1+B-1	0.3701	0.1083	0.357151	29.2859				F1+B-1	0.3701	0.1083	0.357151	14.643
F1+B-2	0.3766	0.1036	0.364777	28.1849				F1+B-2	0.3766	0.1036	0.364777	14.0925
F1-1	0.3568	0.1061	0.343969	31.189				F1-1	0.3568	0.1061	0.343969	15.5945
F1-2	0.3598	0.1014	0.348008	30.6059				F1-2	0.3598	0.1014	0.348008	15.303
F2+B-1	0.3771	0.1135	0.36326	28.404				F2+B-1	0.3771	0.1135	0.36326	14.202
F2+B-2	0.3727	0.1054	0.360411	28.8153				F2+B-2	0.3727	0.1054	0.360411	14.4077
F2-1	0.3621	0.1101	0.348582	30.5231				F2-1	0.3621	0.1101	0.348582	15.2615
F2-2	0.3662	0.1062	0.353584	29.8009				F2-2	0.3662	0.1062	0.353584	14.9005

## Sheet: Fig.3-Keshan1 CEC
The year 2021								The year 2022
R2								R2
Treament				CEC(cmol/kg)				Treament				CEC(cmol/kg)
CK-1	0.3742	0.1083	0.361353	28.6792				CK-1	0.3742	0.1083	0.361353	14.3396
CK-2	0.3677	0.1107	0.354199	29.7121				CK-2	0.3677	0.1107	0.354199	14.8561
F1+B-1	0.3743	0.1142	0.360247	28.839				F1+B-1	0.3743	0.1142	0.360247	14.4195
F1+B-2	0.3719	0.1114	0.358361	29.1113				F1+B-2	0.3719	0.1114	0.358361	14.5557
F1-1	0.3698	0.1103	0.356434	29.3895				F1-1	0.3698	0.1103	0.356434	14.6948
F1-2	0.3635	0.1105	0.349935	30.3277				F1-2	0.3635	0.1105	0.349935	15.1639
F2+B-1	0.3602	0.1083	0.347004	30.751				F2+B-1	0.3602	0.1083	0.347004	15.3755
F2+B-2	0.3607	0.113	0.346552	30.8161				F2+B-2	0.3607	0.113	0.346552	15.408
F2-1	0.3725	0.1115	0.358955	29.0255				F2-1	0.3725	0.1115	0.358955	14.5127
F2-2	0.3713	0.1128	0.357459	29.2415				F2-2	0.3713	0.1128	0.357459	14.6208
R4								R4
Treament				CEC(cmol/kg)				Treament				CEC(cmol/kg)
CK-1	0.3993	0.1292	0.382796	25.5834				CK-1	0.3993	0.1292	0.382796	12.7917
CK-2	0.3647	0.111	0.351062	30.1649				CK-2	0.3647	0.111	0.351062	15.0825
F1+B-1	0.4019	0.1486	0.381485	25.7728				F1+B-1	0.4019	0.1486	0.381485	12.8864
F1+B-2	0.386	0.1199	0.371071	27.2763				F1+B-2	0.386	0.1199	0.371071	13.6382
F1-1	0.3929	0.1234	0.377426	26.3588				F1-1	0.3929	0.1234	0.377426	13.1794
F1-2	0.39	0.132	0.37269	27.0425				F1-2	0.39	0.132	0.37269	13.5213
F2+B-1	0.3979	0.1399	0.379168	26.1073				F2+B-1	0.3979	0.1399	0.379168	13.0536
F2+B-2	0.3737	0.1205	0.35834	29.1143				F2+B-2	0.3737	0.1205	0.35834	14.5571
F2-1	0.373	0.1223	0.357254	29.2711				F2-1	0.373	0.1223	0.357254	14.6356
F2-2	0.3734	0.113	0.35957	28.9367				F2-2	0.3734	0.113	0.35957	14.4683
R6								R6
Treament				CEC(cmol/kg)				Treament				CEC(cmol/kg)
CK-1	0.3804	0.108	0.36777	27.7528				CK-1	0.3804	0.108	0.36777	13.8764
CK-2	0.3827	0.1093	0.369861	27.4509				CK-2	0.3827	0.1093	0.369861	13.7255
F1+B-1	0.3755	0.1135	0.36162	28.6407				F1+B-1	0.3755	0.1135	0.36162	14.3204
F1+B-2	0.3759	0.1114	0.362461	28.5194				F1+B-2	0.3759	0.1114	0.362461	14.2597
F1-1	0.3698	0.1091	0.356679	29.354				F1-1	0.3698	0.1091	0.356679	14.677
F1-2	0.3276	0.1059	0.31408	35.5042				F1-2	0.3276	0.1059	0.31408	17.7521
F2+B-1	0.374	0.1102	0.360759	28.765				F2+B-1	0.374	0.1102	0.360759	14.3825
F2+B-2	0.3616	0.11	0.34809	30.5941				F2+B-2	0.3616	0.11	0.34809	15.297
F2-1	0.382	0.1132	0.368344	27.67				F2-1	0.382	0.1132	0.368344	13.835
F2-2	0.3686	0.1093	0.355409	29.5375				F2-2	0.3686	0.1093	0.355409	14.7688
R8								R8
Treament				CEC(cmol/kg)				Treament				CEC(cmol/kg)
CK-1	0.3717	0.1087	0.358709	29.061				CK-1	0.3717	0.1087	0.358709	14.5305
CK-2	0.3701	0.1038	0.358073	29.1527				CK-2	0.3701	0.1038	0.358073	14.5764
F1+B-1	0.3919	0.1152	0.378082	26.2641				F1+B-1	0.3919	0.1152	0.378082	13.1321
F1+B-2	0.3885	0.1209	0.373428	26.936				F1+B-2	0.3885	0.1209	0.373428	13.468
F1-1	0.3685	0.1069	0.355798	29.4813				F1-1	0.3685	0.1069	0.355798	14.7406
F1-2	0.3705	0.1027	0.358709	29.061				F1-2	0.3705	0.1027	0.358709	14.5305
F2+B-1	0.38	0.1089	0.367175	27.8387				F2+B-1	0.38	0.1089	0.367175	13.9193
F2+B-2	0.3807	0.1041	0.368877	27.593				F2+B-2	0.3807	0.1041	0.368877	13.7965
F2-1	0.3793	0.1088	0.366478	27.9393				F2-1	0.3793	0.1088	0.366478	13.9696
F2-2	0.361	0.1005	0.349423	30.4017				F2-2	0.361	0.1005	0.349423	15.2009

## Sheet: Fig.4-Heihe43 ZETA
	CK	F1+B	F1	F2+B	F2
R2	-21.3	-30.23	-23.62	-39.56	-29.36
R4	-39.84	-48.46	-42.86	-54.01	-44.48
R6	-45.96	-58.26	-49.93	-62.02	-51.93
R8	-48.64	-61.76	-52.66	-64.05	-55.29

## Sheet: Fig.4-Keshan1 ZETA
	CK	F1+B	F1	F2+B	F2
R2	-29.69	-44.57	-35.17	-50.65	-39.58
R4	-48.03	-55.44	-49.87	-62.25	-49.34
R6	-53.89	-66.44	-58.84	-68.32	-62.35
R8	-54.09	-68.94	-62.46	-71.6	-65.34
